# Supplementary material for: Lipid-soluble arsenic species identified in the brain of the marine fish skipjack tuna (Katsuwonus pelamis) using a sequential extraction and HPLC/mass spectrometry
Source: Royal Society of Chemistry journal article supplement (doi:10.1039/c9ja00249a), 2019-01-01
Supplement: c9ja00249a1.pdf [file c9ja00249a1.pdf]

## ***Electronic Supplementary Information***

### **Lipid-soluble arsenic species identified in the brain of the marine fish skipjack tuna (*Katsuwonus pelamis*) using a sequential extraction and HPLC/mass spectrometry**

Michael Stiboller<sup>a</sup>, Fabiana P. Freitas<sup>b</sup>, Kevin A. Francesconi<sup>a</sup>, Tanja Schwerdtle<sup>c</sup>, António J. A. Nogueira<sup>b</sup> and Georg Raber<sup>a#</sup>

<sup>a</sup>University of Graz, Institute of Chemistry, Analytical Chemistry NAWI Graz, Universitätsplatz 1/I, 8010 Graz.

<sup>b</sup>University of Aveiro, Department of Biology & CESAM, 3810 Aveiro, Portugal

<sup>c</sup>University of Potsdam, Institute of Nutritional Sciences, Food Chemistry, Arthur-Scheunert-Alle 114-116, 14558 Nuthetal, Germany

#Corresponding author: [georg.raber@uni-graz.at](mailto:georg.raber@uni-graz.at)

#### **Table of Content**

**Figure S1** HPLC/ICPMS chromatograms of DCM/MeOH, MTBE/MeOH and pyridine crude extracts of tuna brain.

**Figure S2.** Overlay of cation-exchange HPLC/ICPMS chromatograms and cation-exchange HPLC/HR ESMS extracted ion chromatograms of specific protonated arsenic compounds of brain crude water extract of skipjack tuna fish no. 4.

**Figure S3.** Overlay of cation-exchange HPLC/ICPMS chromatograms and cation-exchange HPLC/HR ESMS extracted ion chromatograms of specific protonated arsenic compounds of muscle crude water extract of skipjack tuna fish no. 4.

**Figure S4.** HPLC/ICPMS chromatograms of silica-purified pyridine extract of BCR-627 tuna fish tissue.

**Figure S5.** Mean total As concentrations of freeze-dried muscle (n=4) and brain tissues (n=2) of the natural marine fish skipjack tuna (*Katsuwonus pelamis*).

**Figure S6.** Cation-exchange HPLC/ICPMS chromatograms of water-soluble arsenic standards and crude water extracts of brain and muscle of skipjack tuna fish no. 4.

**Figure S7.** HPLC/ICPMS chromatograms of an arsenolipid standard mixture and of crude pyridine extracts of brain tissues of skipjack tuna fish

**Figure S8.** HPLC/ICPMS chromatograms of arsenolipid standard mixture and of silica-purified pyridine extracts of brain tissues of skipjack tuna fish

**Figure S9.** HPLC/ICPMS chromatograms of arsenolipid standard mixture and of silica-purified pyridine extracts of muscle tissues of skipjack tuna fish

**Figure S10.** HPLC/ICPMS chromatograms of crude and silica-purified pyridine extracts of brain tissue of skipjack tuna no.

**Figure S11.** MS<sup>2</sup> spectra of AsFA Me-esters in silica-purified brain extracts of skipjack tuna.

**Table S1.** Identification (HPLC/HR ESMS) and quantification (HPLC/ICPMS) of arsenolipids in BCR-627 tuna fish tissue.

**Table S2.** Arsenic species in brain and muscle tissues of skipjack tuna fish identified by HPLC/HR ESMS.

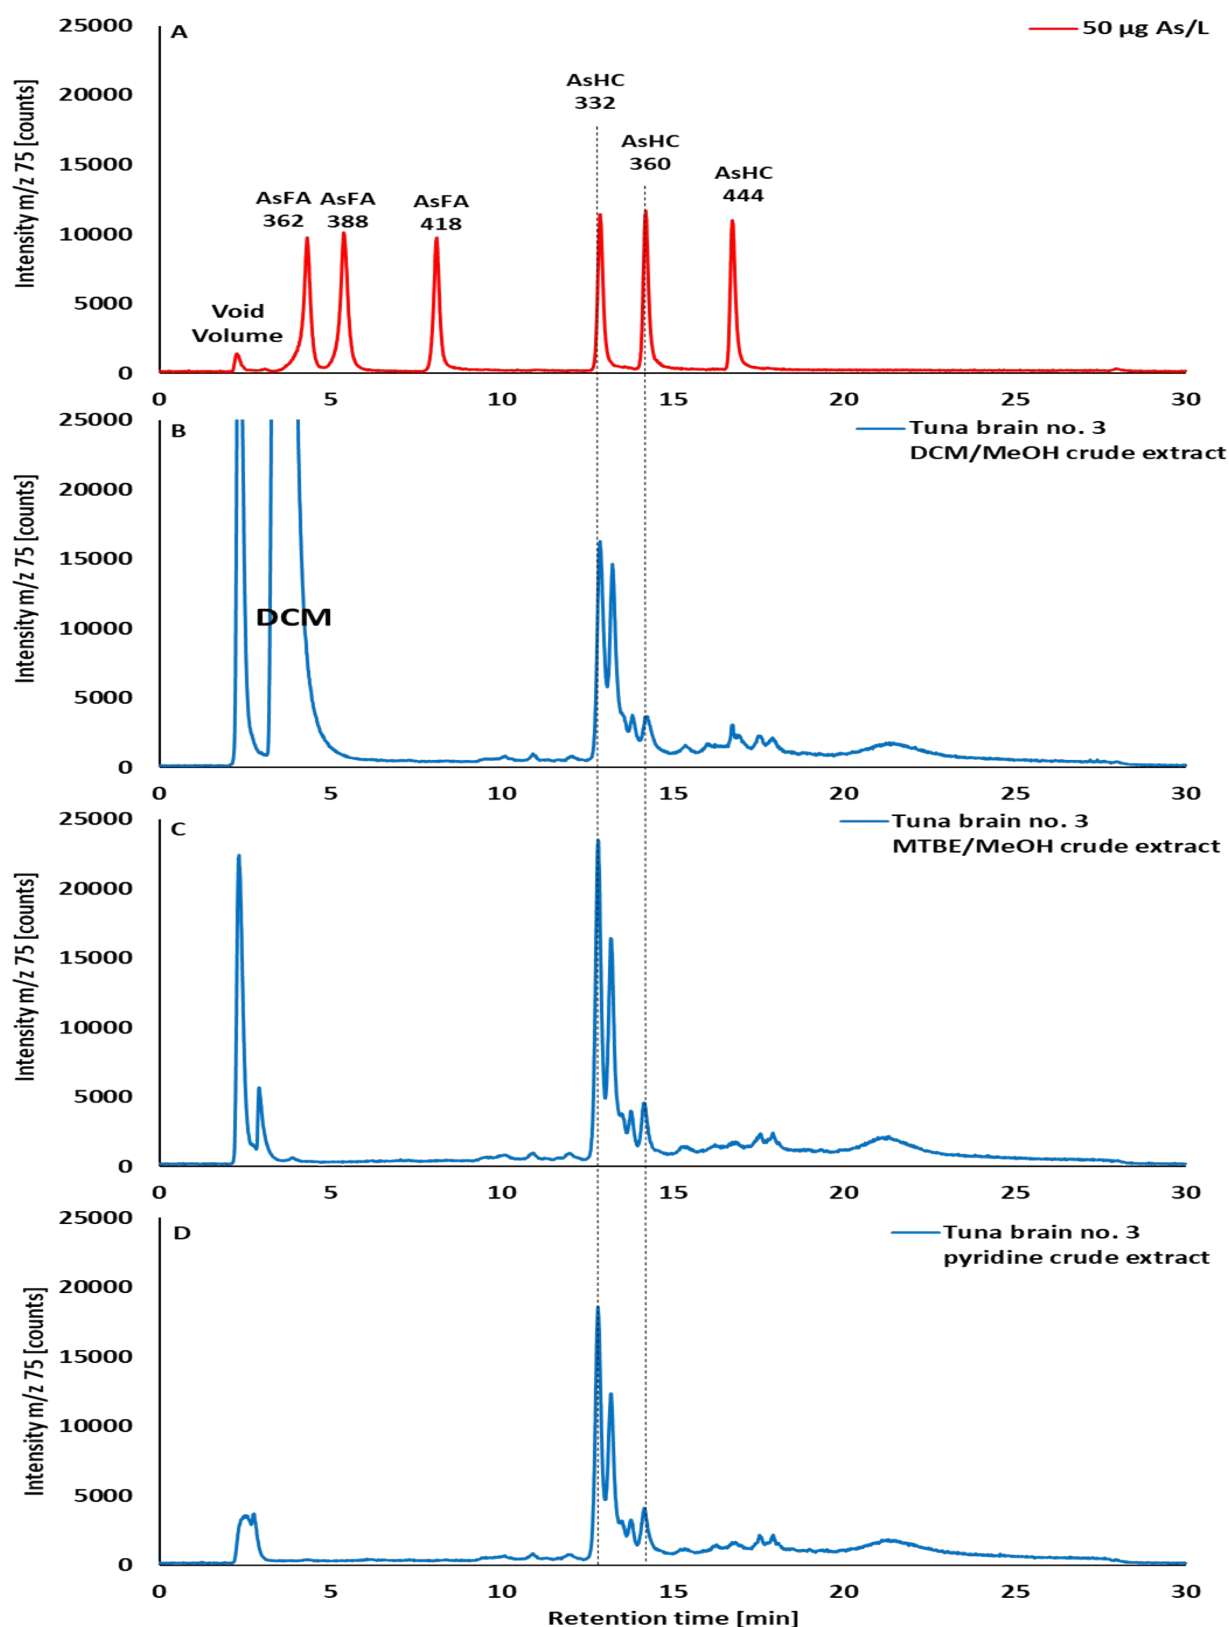

**Figure S1.** HPLC/ICPMS chromatograms of (A) a 50  $\mu\text{g}$  As/L arsenolipid mixed standard solution and tuna brain no. 3 organic crude extracts of (B) DCM/MeOH, (C) MTBE/MeOH and (D) pyridine extractions. Column, ACE Ultra Core 5 SuperPhenylHexyl (250 x 4.6 mm; 5  $\mu\text{m}$ ); mobile phases, 25 mM  $\text{NH}_4(\text{CH}_3\text{COO})/\text{water}$  pH 9.2 (pH adjusted with aqueous ammonia) and 25 mM  $\text{NH}_4(\text{CH}_3\text{COO})/\text{MeOH}$  pH 9.2; gradient elution: 0-15 min from 60-100%, 15-25 min holding at 100%, and returning at 25.1min to 60% 25 mM  $\text{NH}_4(\text{CH}_3\text{COO})/\text{MeOH}$  pH 9.2; flow rate, 1 mL/min; T, 40°C and injection volume 20  $\mu\text{L}$ .

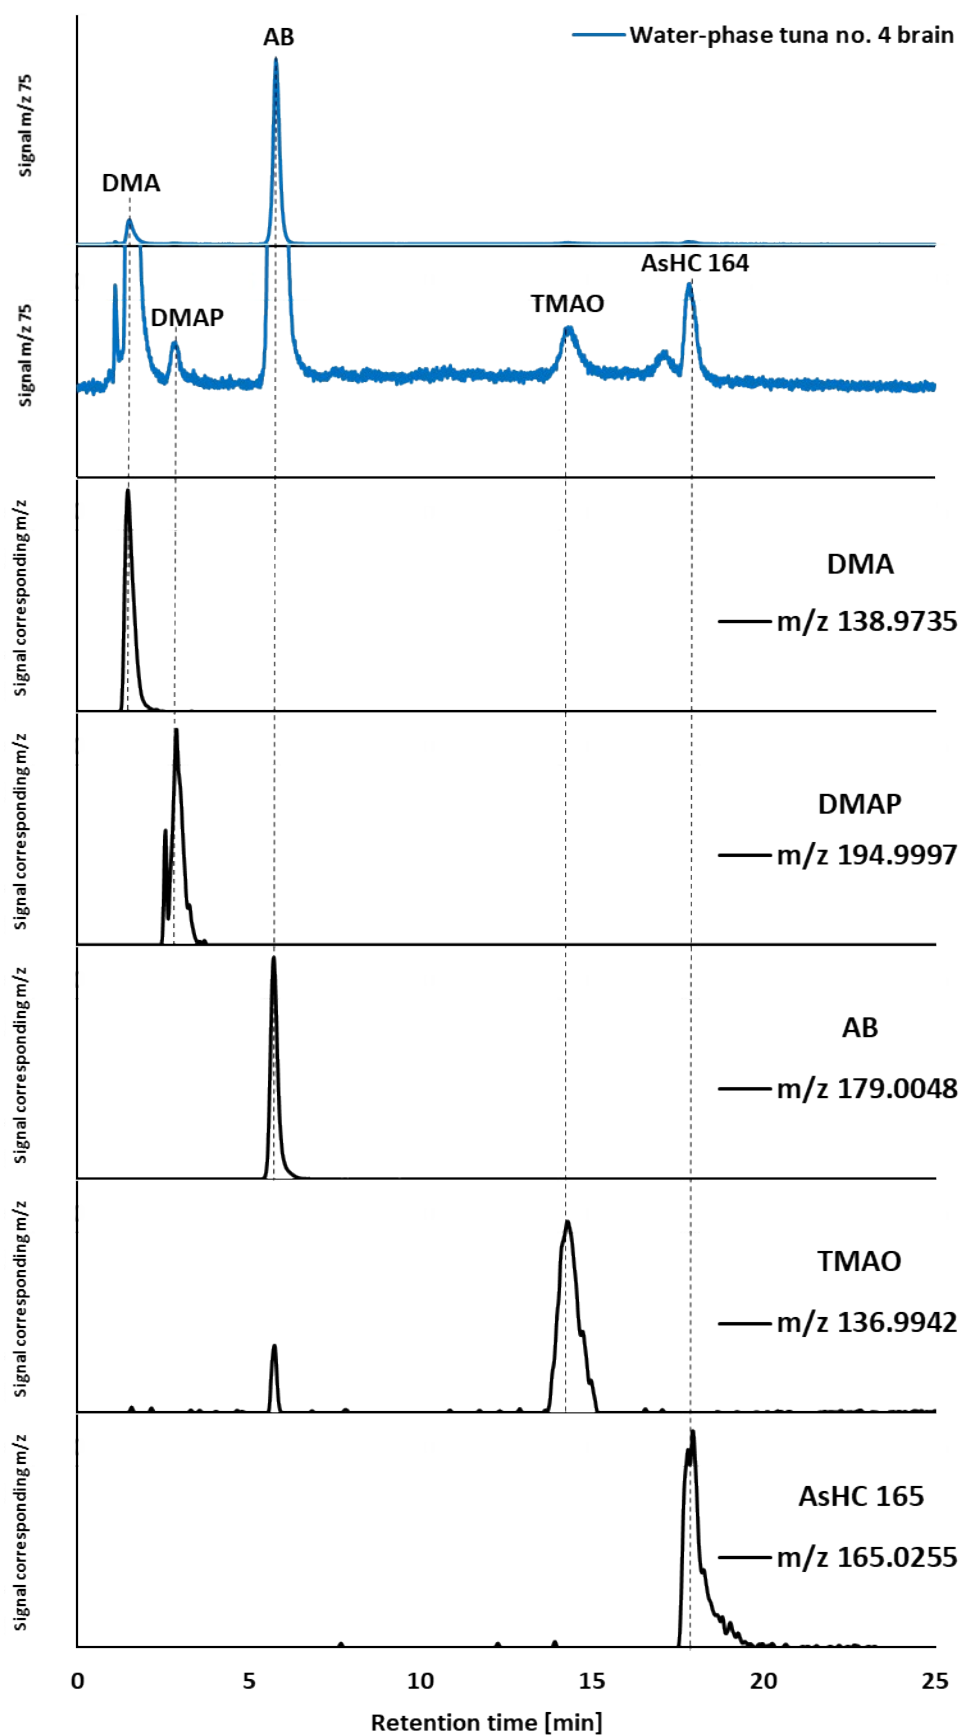

**Figure S2.** Overlay of cation-exchange HPLC/ICPMS chromatograms (blue) and cation-exchange HPLC/HR ESMS extracted ion chromatograms (black) of specific protonated  $m/z$  of DMA, AB, TMAO and AsHC 164 (extraction window  $\pm 5$  ppm) of brain water crude extract of skipjack tuna no. 4.

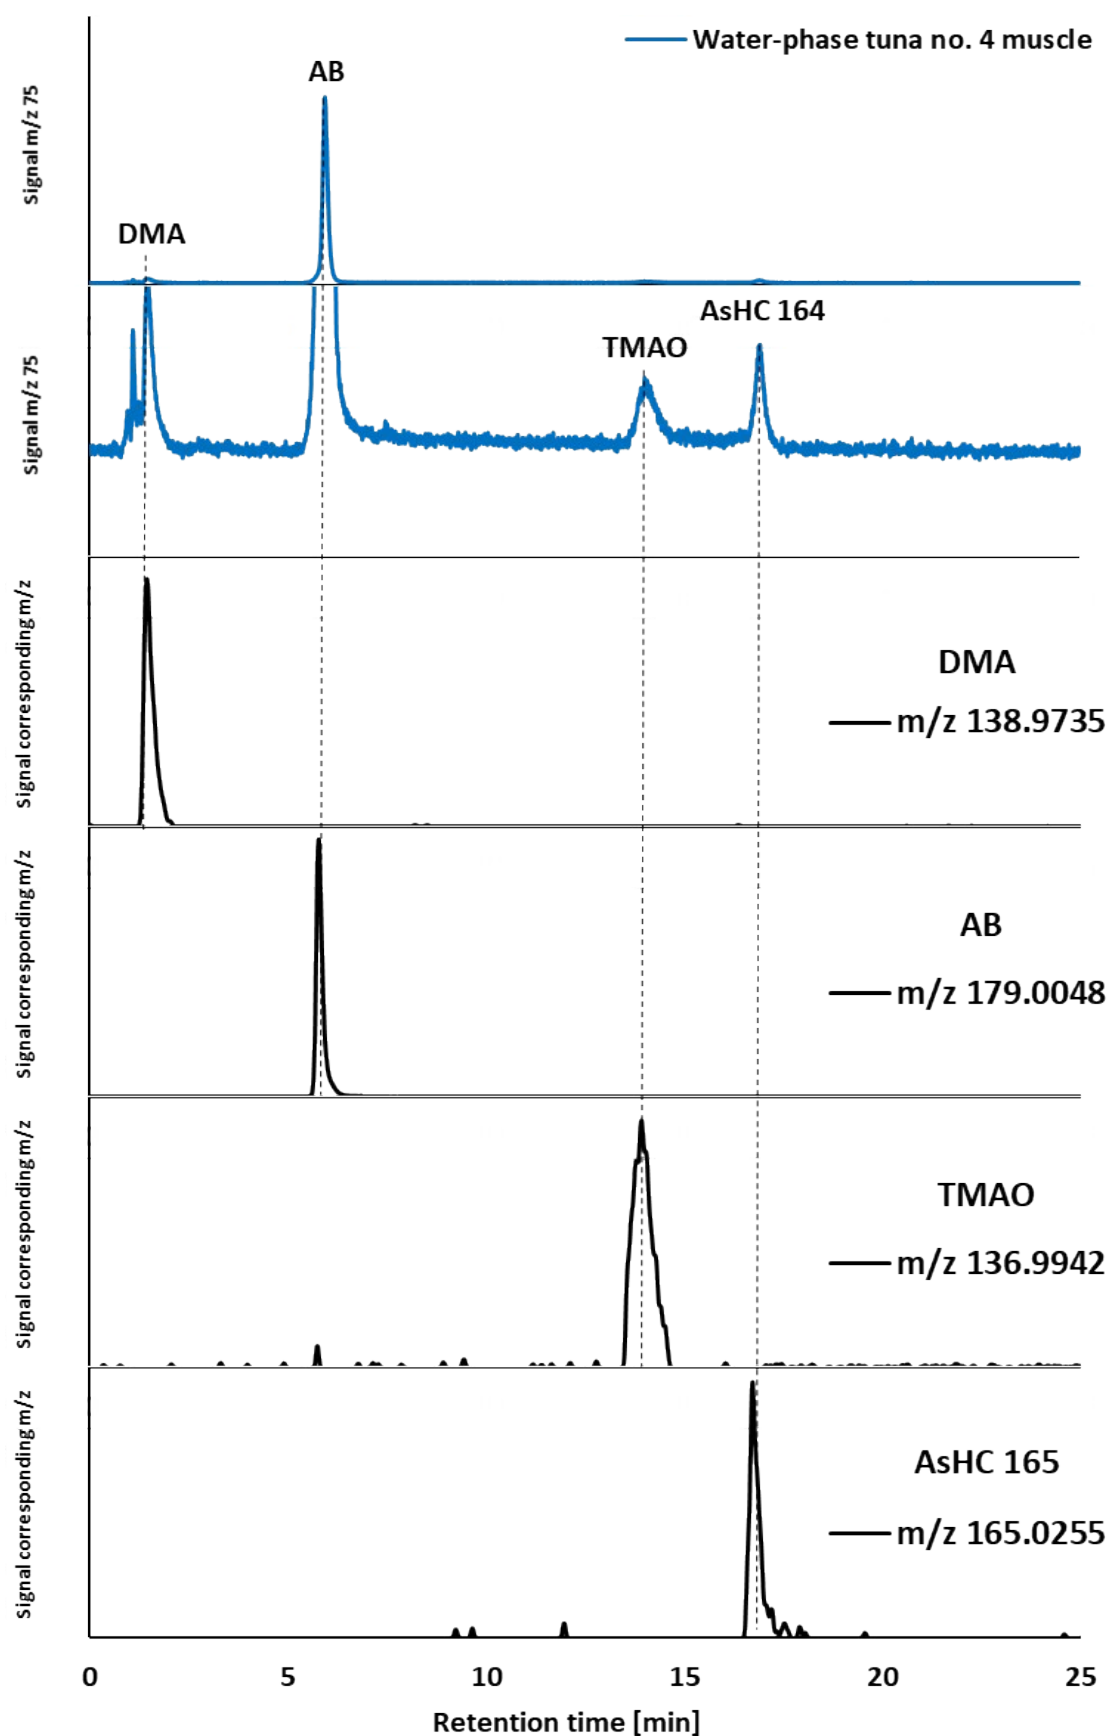

**Figure S3.** Overlay of cation-exchange HPLC/ICPMS chromatograms (blue) and cation-exchange HPLC/HR ESMS extracted ion chromatograms (black) of specific protonated  $m/z$  of DMA, AB, TMAO and AsHC 164 (extraction window  $\pm 5$  ppm) of muscle crude water extract of skipjack tuna no. 4.

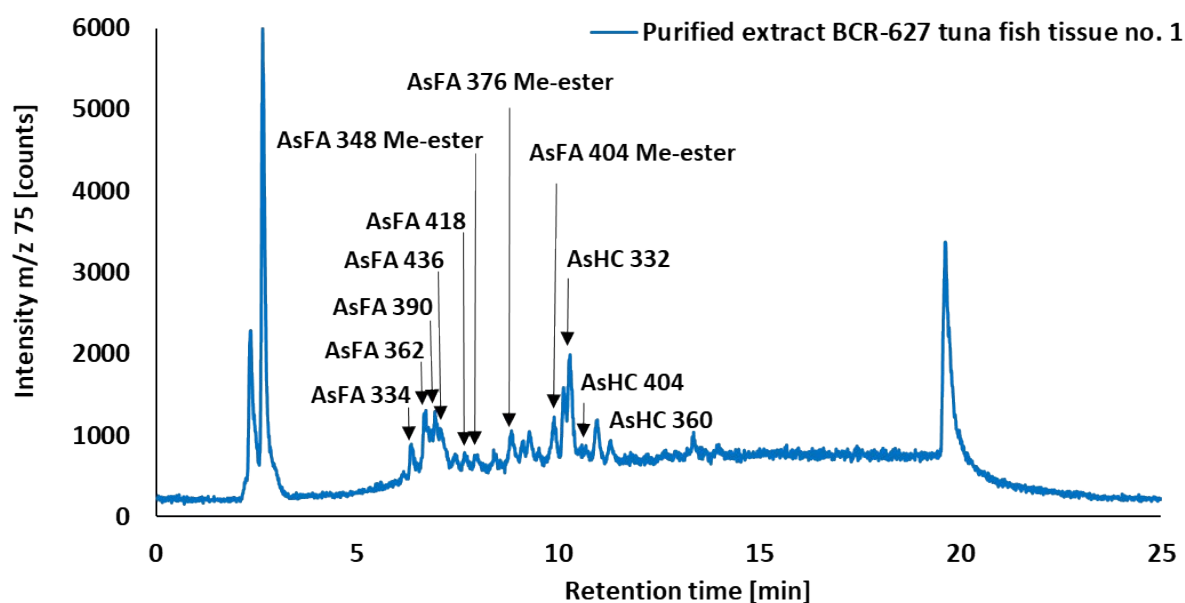

**Figure S4.** HPLC/ICPMS chromatogram of silica-purified pyridine extract of BCR-627 tuna fish tissue no. 1. Column, ACE Ultra Core 5 SuperPhenylHexyl (250 x 4.6 mm; 5  $\mu$ m); mobile phases, 25 mM  $\text{NH}_4(\text{CH}_3\text{COO})/\text{water}$  pH 9.2 (pH adjusted with aqueous ammonia) and 25 mM  $\text{NH}_4(\text{CH}_3\text{COO})/\text{MeOH}$  pH 9.2; gradient elution: 0-2 min from 0-20%, 2-4 min from 20-80%, 4-12 min from 80-100%, 12-17 min holding at 100% and returning at 17.1min to 25 min to 0% 25 mM  $\text{NH}_4(\text{CH}_3\text{COO})/\text{MeOH}$  pH 9.2; flow rate, 1 mL/min; T, 40°C and injection volume 20  $\mu$ L.

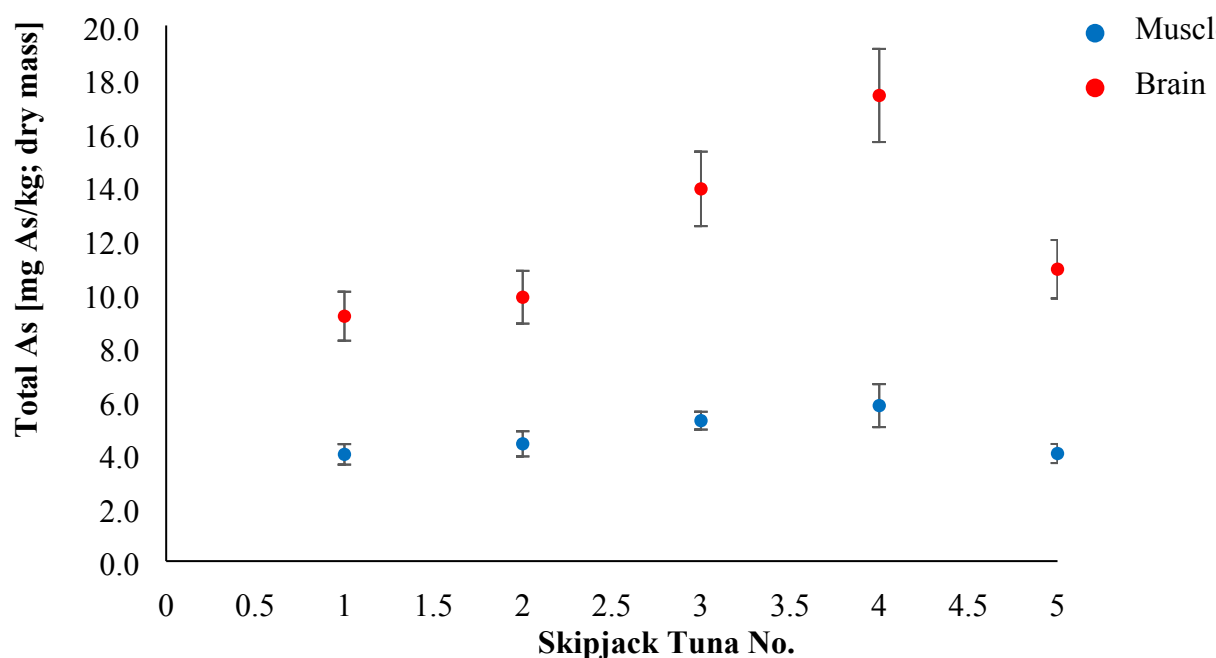

**Figure S5.** Mean total As concentrations of freeze-dried muscle (n=4) and brain tissues (n=2) of the natural marine fish Skipjack tuna (*Katsuwonus pelamis*). Error bars represent standard deviations of four and two replicates of muscle and brain tissues respectively. Error bars of brain tissues are calculated as  $\pm 10\%$  (estimated precision of total As determination by ICPMS. The relative deviation of the total As content of the two brain replicates was  $\leq 5\%$ ).

**Table S1.** Arsenolipids identified in purified extracts by HPLC/HR ESMS in the certified reference material BCR-627 tuna fish tissue (not certified for arsenolipids) after pyridine extraction and SPE-silica purification. Quantification of respective arsenolipids was performed by HPLC/ICPMS (mean  $\pm$  SD; n=3; dry mass).

| Compound code              | Formula [M+H] <sup>+</sup>                       | Mass Theor. | Mass Exp. | $\Delta m$ [ppm] | Concentration [ $\mu g$ As/kg]   |
|----------------------------|--------------------------------------------------|-------------|-----------|------------------|----------------------------------|
| <b>AsFA 334</b>            | C <sub>15</sub> H <sub>32</sub> AsO <sub>3</sub> | 335.1562    | 335.1565  | -0.9             | 9 $\pm$ 1                        |
| <b>AsFA 362</b>            | C <sub>17</sub> H <sub>36</sub> AsO <sub>3</sub> | 363.1875    | 363.1867  | -2.2             | 20 $\pm$ 2                       |
| <b>AsFA 390</b>            | C <sub>19</sub> H <sub>40</sub> AsO <sub>3</sub> | 391.2188    | 391.2190  | 0.5              | 15 $\pm$ 2                       |
| <b>AsFA 436</b>            | C <sub>23</sub> H <sub>38</sub> AsO <sub>3</sub> | 437.2031    | 437.2039  | 1.8              | 16 $\pm$ 1                       |
| <b>AsFA 418</b>            | C <sub>21</sub> H <sub>44</sub> AsO <sub>3</sub> | 419.2501    | 419.2506  | 1.2              | 10 $\pm$ 1                       |
| <b>AsHC 332</b>            | C <sub>17</sub> H <sub>38</sub> AsO              | 333.2133    | 333.2130  | -0.9             | 28 $\pm$ 3                       |
| <b>AsHC 360</b>            | C <sub>19</sub> H <sub>42</sub> AsO              | 361.2446    | 361.2447  | 0.3              | 9 $\pm$ 1                        |
| <b>AsHC 404</b>            | C <sub>23</sub> H <sub>38</sub> AsO              | 405.2133    | 405.2133  | 0.1              | 6 $\pm$ 2                        |
| <b>AsFA 348 Me-ester</b>   | C <sub>16</sub> H <sub>34</sub> AsO <sub>3</sub> | 349.1718    | 349.1718  | 0.1              | 10 $\pm$ 1                       |
| <b>AsFA 376 Me-ester</b>   | C <sub>18</sub> H <sub>38</sub> AsO <sub>3</sub> | 377.2031    | 377.2023  | -2.2             | 16 $\pm$ 1                       |
| <b>AsFA 404 Me-ester</b>   | C <sub>20</sub> H <sub>42</sub> AsO <sub>3</sub> | 405.2344    | 405.2343  | -0.3             | 6 $\pm$ 2                        |
| <b>Arsenolipid content</b> |                                                  |             |           |                  | 300 $\pm$ 15                     |
| <b>Total As (n=6)</b>      |                                                  |             |           |                  | <b>4700 <math>\pm</math> 300</b> |

**Table S2.** Arsenic species identified by HPLC/HR ESMS in crude water extracts of brain and muscle tissues of skipjack tuna.

| Abbreviation Arsenic Compound | Molecular Formula [M]                           | Theor. Molecular mass [M+H] <sup>+</sup> | Muscle                                 | Brain                                  |
|-------------------------------|-------------------------------------------------|------------------------------------------|----------------------------------------|----------------------------------------|
|                               |                                                 |                                          | Exp. Molecular Mass [M+H] <sup>+</sup> | Exp. Molecular Mass [M+H] <sup>+</sup> |
| <b>DMA</b>                    | C <sub>2</sub> H <sub>7</sub> AsO <sub>2</sub>  | 138.9735                                 | 138.9732<br>( $\Delta m$ = -1.9)       | 138.9733<br>( $\Delta m$ = -1.5)       |
| <b>DMAp</b>                   | C <sub>5</sub> H <sub>11</sub> AsO <sub>3</sub> | 194.9997                                 | Not detected                           | 194.9995<br>( $\Delta m$ = -0.8)       |
| <b>AB</b>                     | C <sub>5</sub> H <sub>12</sub> AsO <sub>2</sub> | 179.0048                                 | 179.0046<br>( $\Delta m$ = -1.0)       | 179.0046<br>( $\Delta m$ = -1.1)       |
| <b>TMAO</b>                   | C <sub>3</sub> H <sub>9</sub> AsO               | 136.9942                                 | 136.9939<br>( $\Delta m$ = - 2.7)      | 136.9940<br>( $\Delta m$ = - 1.3)      |
| <b>AsHC 164</b>               | C <sub>5</sub> H <sub>13</sub> AsO              | 165.0255                                 | 165.0252<br>( $\Delta m$ = -2.2)       | 165.0257<br>( $\Delta m$ = 0.3)        |

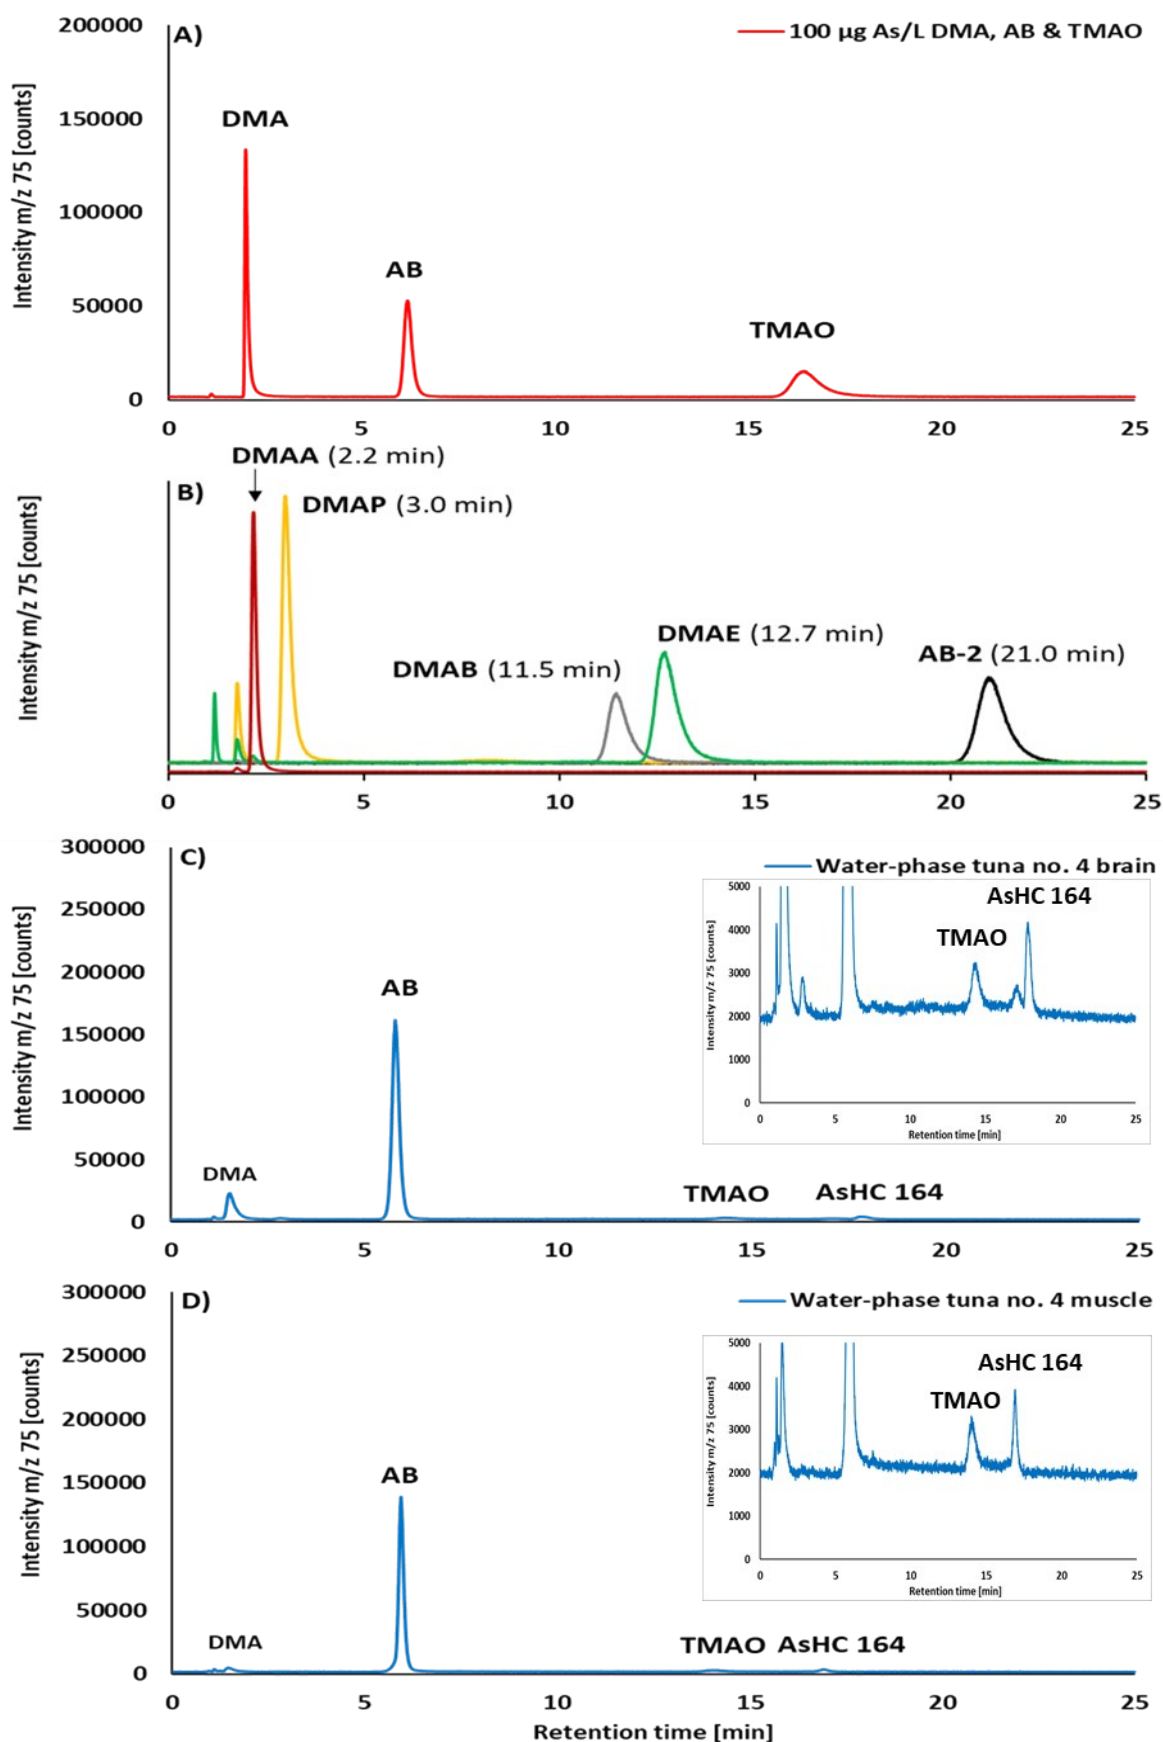

**Figure S6.** Cation-exchange HPLC/ICPMS chromatograms of A) DMA, AB and TMAO (each 100  $\mu\text{g As/L}$ ) calibration mixed standard solution, B) single standards of DMAA, DMAP, DMAB, DMAE and AB-2 (each 100  $\mu\text{g As/L}$ ), and water crude extracts of C) brain and D) muscle of skipjack tuna no. 4.



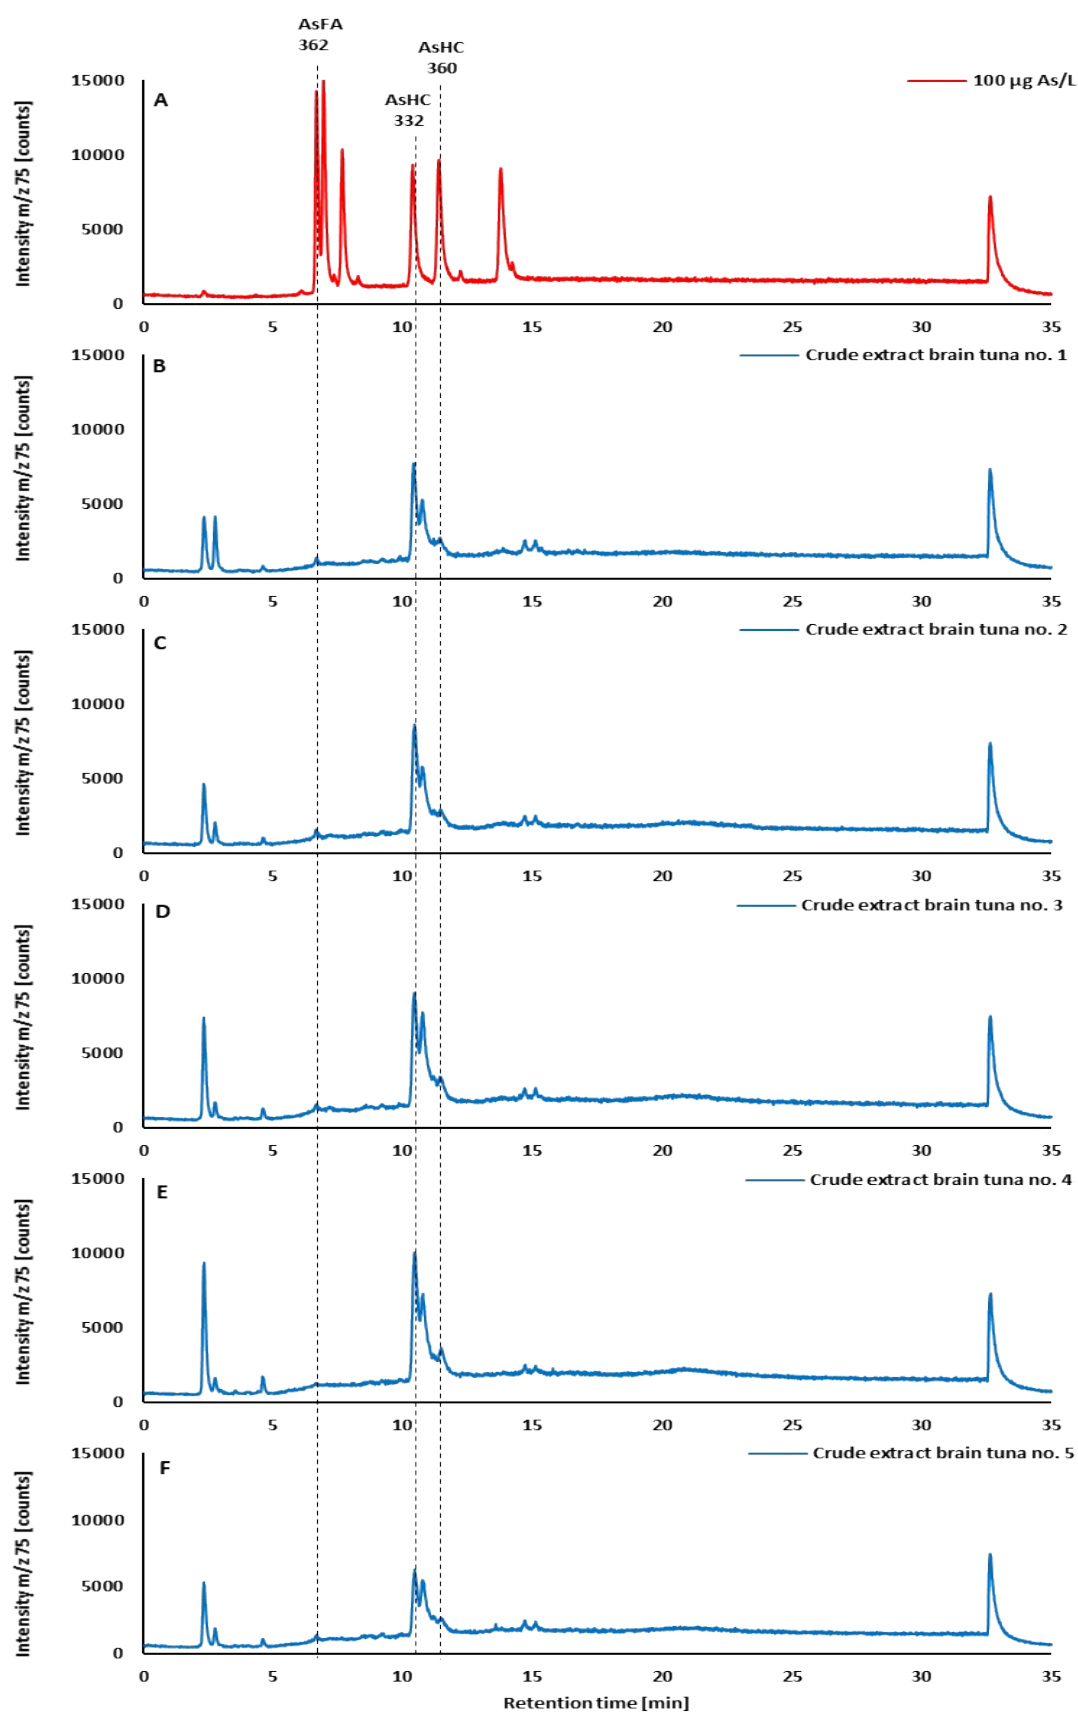

**Figure S7.** HPLC/ICPMS chromatograms of A) arsenolipid standard mixture and of B-G) pyridine crude extracts of brain tissues of skipjack tuna no. 1 -5.

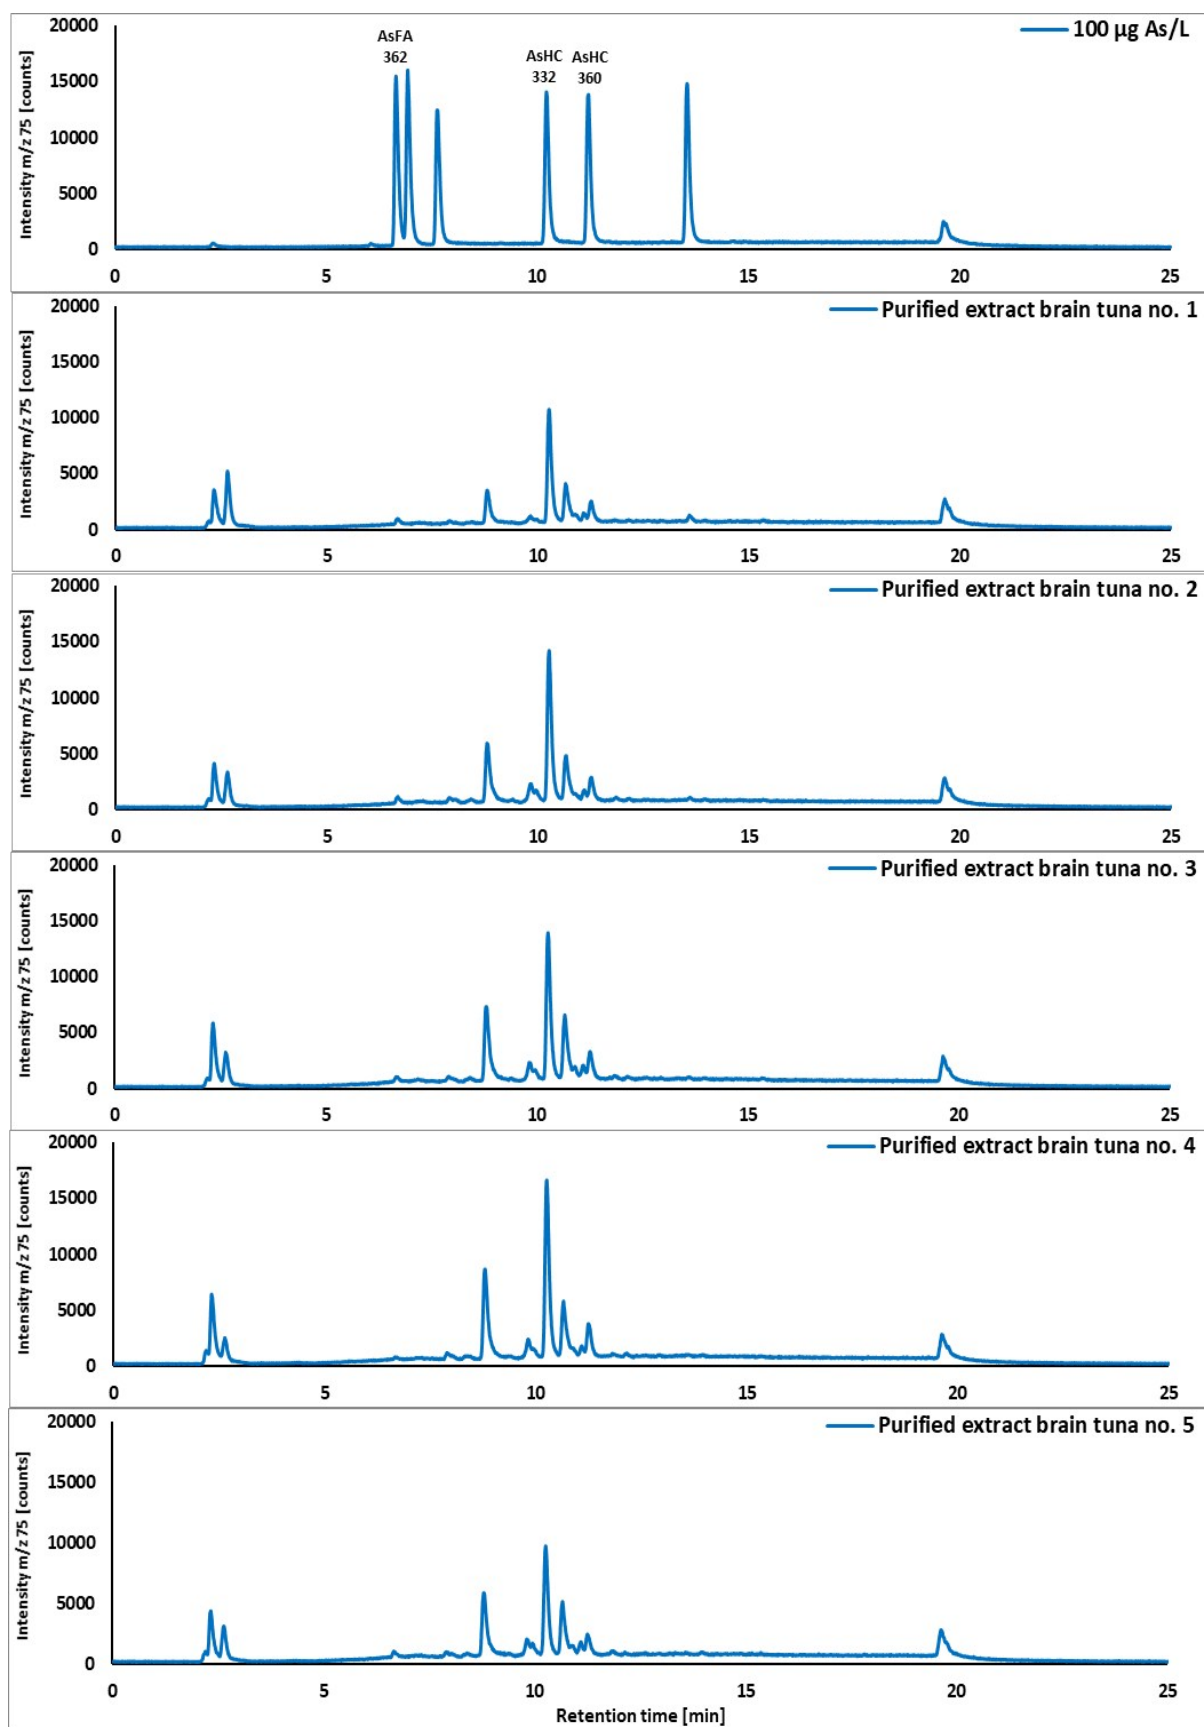

**Figure S8.** HPLC/ICPMS chromatograms of arsenolipid standard mixture and of silica-purified pyridine extracts of brain tissues of skipjack tuna no. 1 -5.

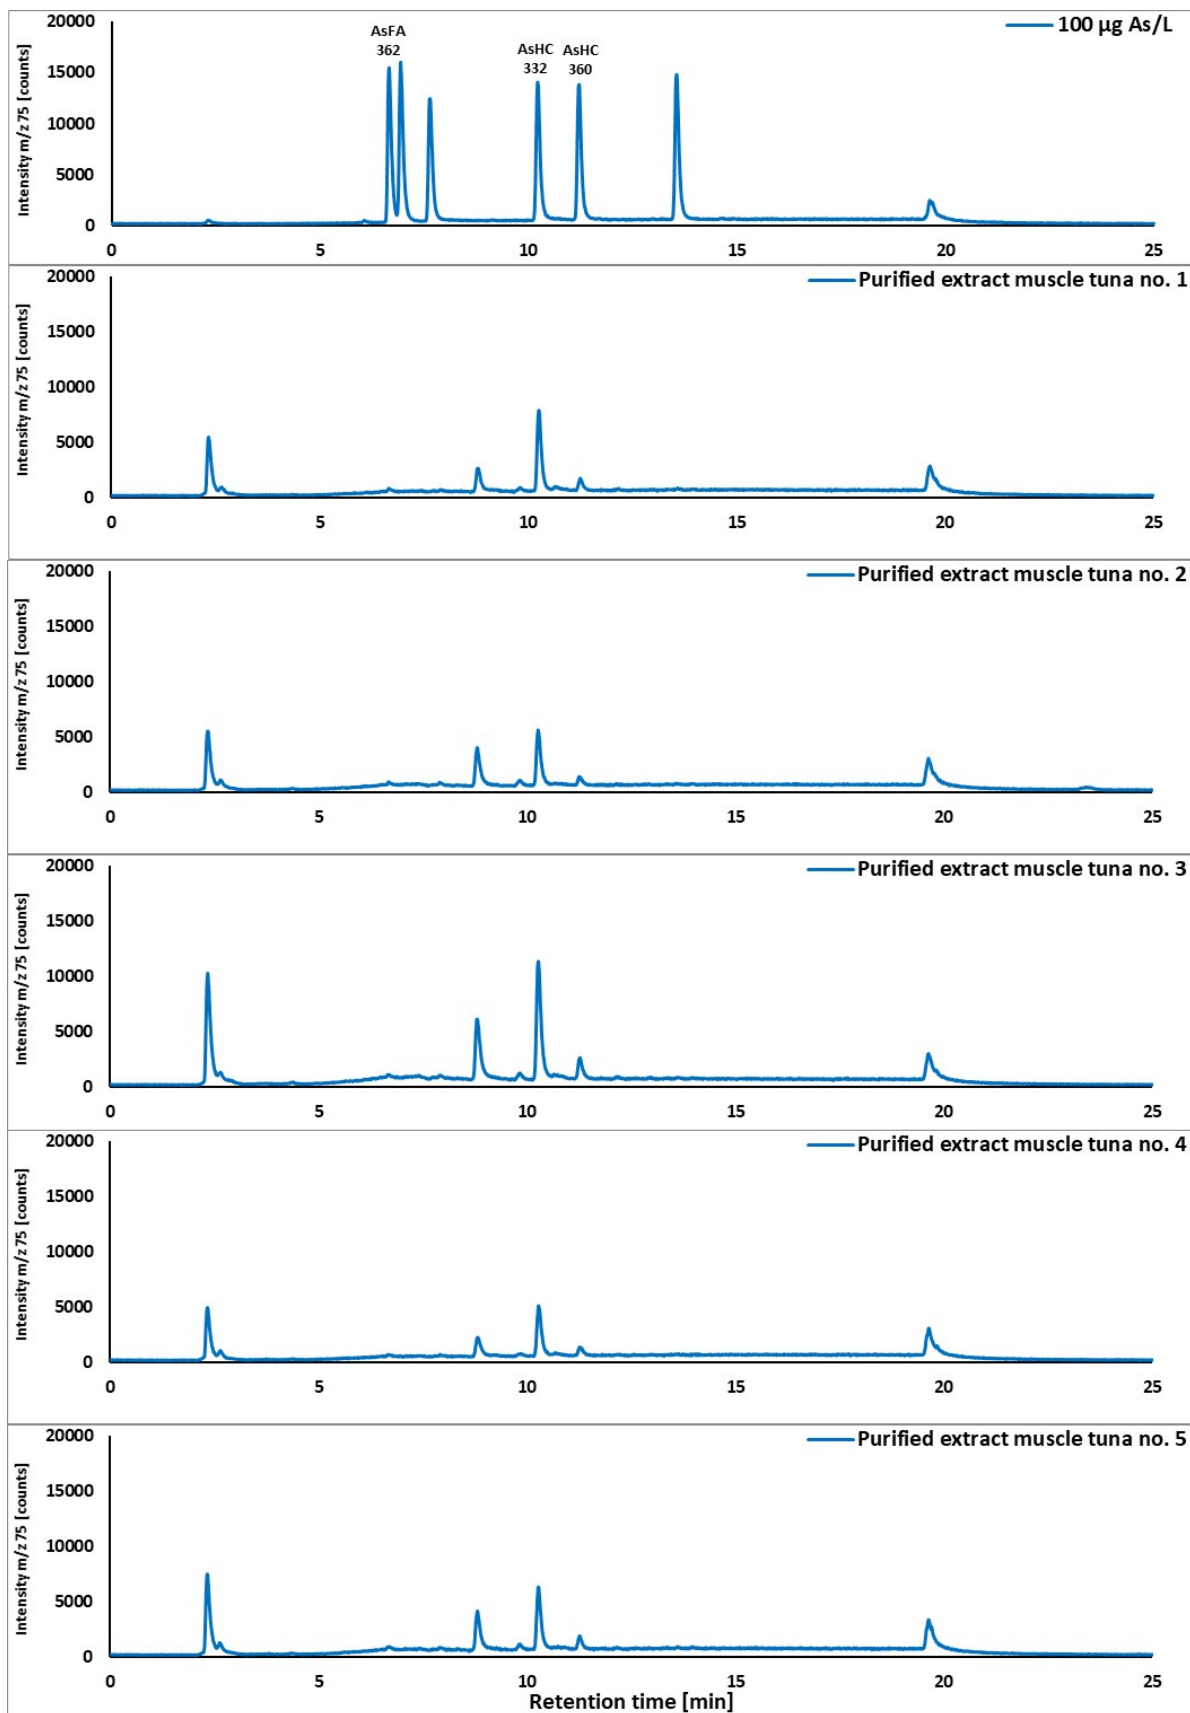

**Figure S9.** HPLC/ICPMS chromatograms of arsenolipid standard mixture and of silica-purified pyridine extracts of muscle tissues of skipjack tuna no. 1 -5.

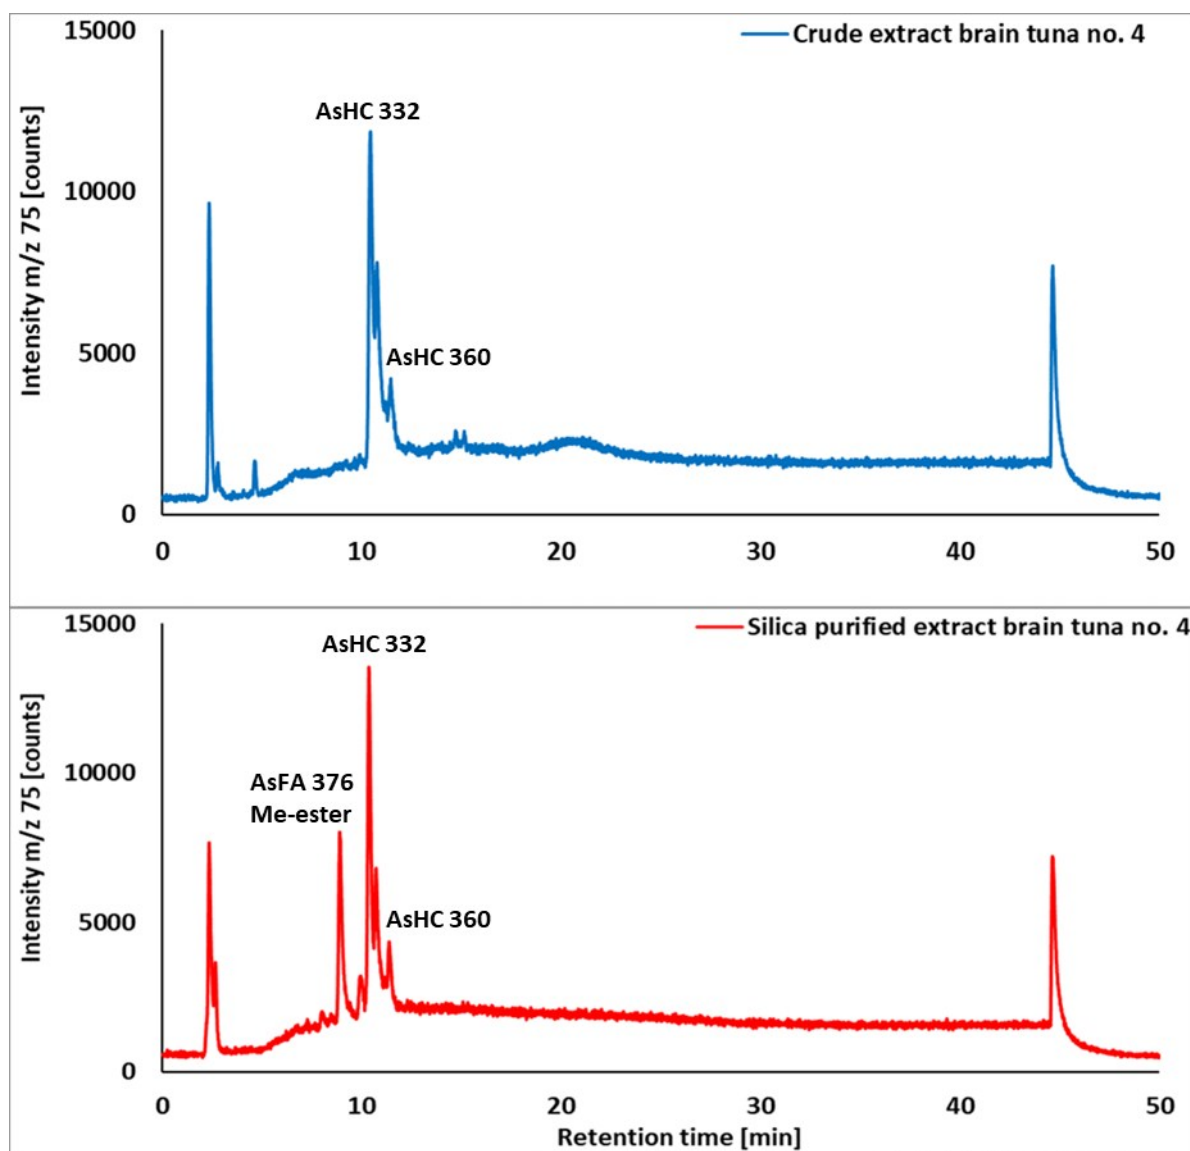

**Figure S10.** HPLC/ICPMS chromatograms of crude (blue) and silica-purified pyridine extracts (red) of brain tissue of skipjack tuna no. 4. Runtime set 50 min to exclude arsenolipids eluting after 25 min in crude and purified brain extracts.

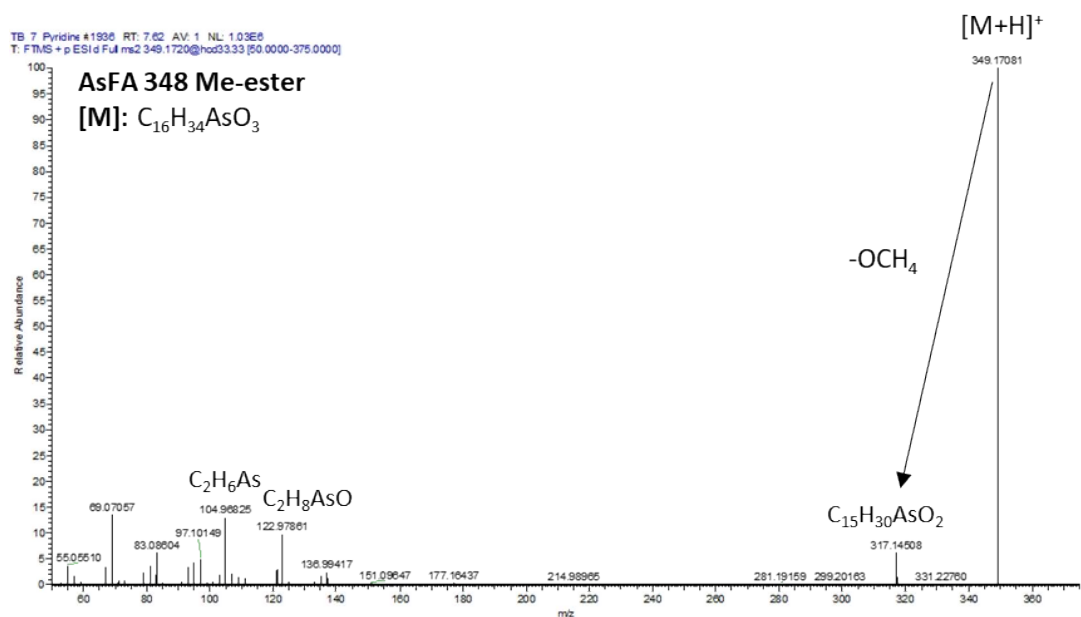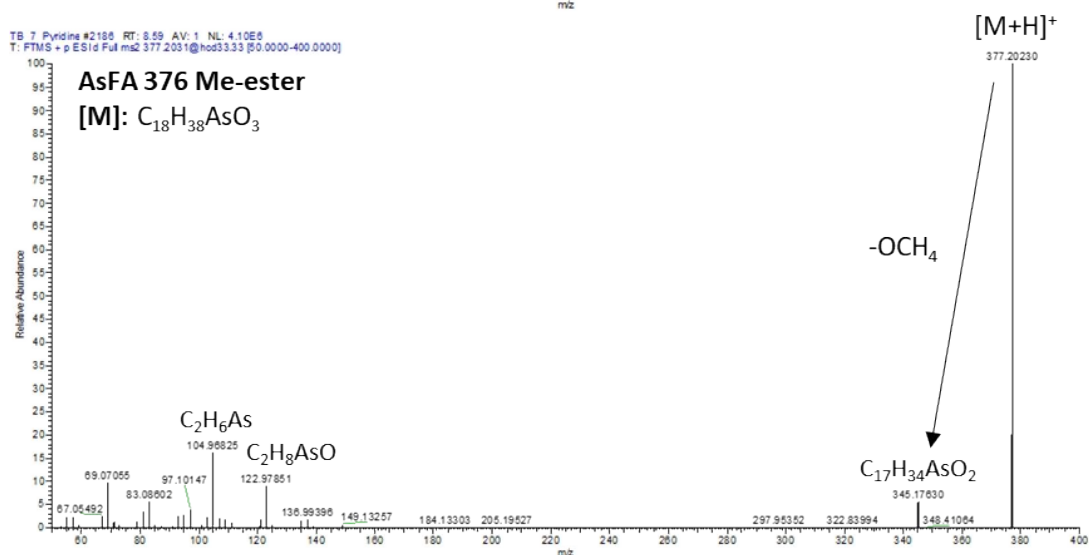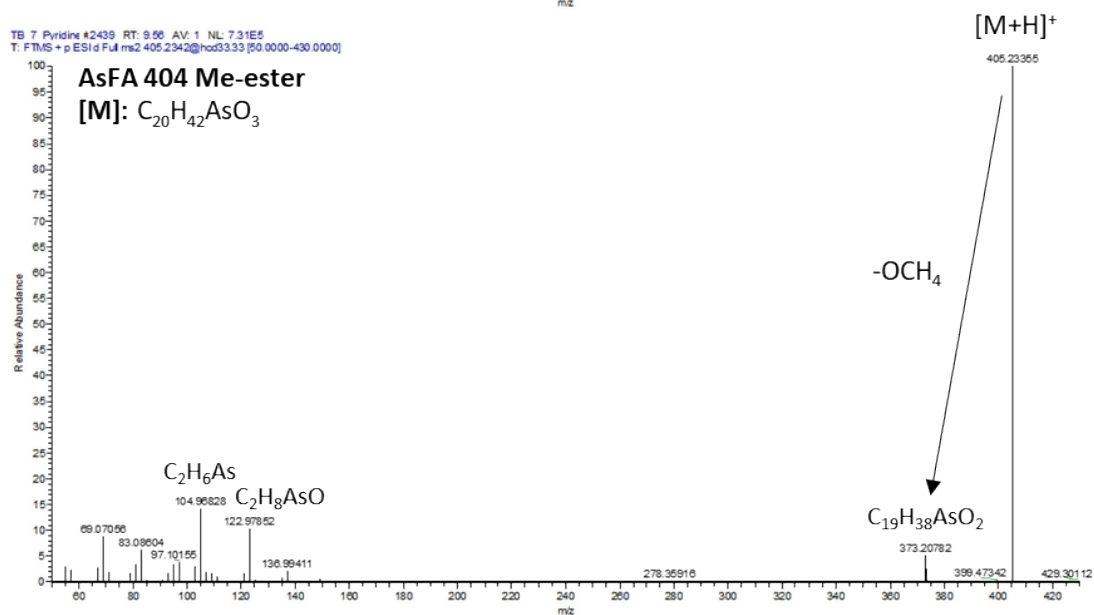

**Figure S11.** MS<sup>2</sup> spectra of AsFA Me-esters 348, 376 and 404 in silica-purified brain tissues of skipjack tuna obtained by HPLC/HR ESMS.
